# Supplementary material for: Efficient H2 adsorption using a bimetallic Ni–Zn zeolite imidazole skeleton
Source: Royal Society of Chemistry journal article supplement (doi:10.1039/d3nj03530a), 2023-01-01
Supplement: d3nj03530a1.pdf [file d3nj03530a1.pdf]

## Electronic supplementary information (ESI)

### Efficiently H<sub>2</sub> adsorption by bimetallic Ni-Zn zeolite imidazole skeleton

Xiaoqian Peng<sup>a</sup>, Jing Zhang<sup>a,\*</sup>, Xu Zhang<sup>a</sup>, Xiaochan Liu<sup>a</sup>, Zhiqiang Huang<sup>b</sup>,  
Haibo Li<sup>b</sup>, Xibin Yi<sup>a</sup>

<sup>a</sup> *Shandong Key Laboratory for Special Silicon-containing Material, Advanced  
Materials Institute, Qilu University of Technology (Shandong Academy of Sciences),  
Jinan, 250014, China*

<sup>b</sup> *Binzhou Double Peaks GRAPHITE Sealing Material Co., Ltd.*

**Keywords:** ZIF-8; H<sub>2</sub> adsorption; Bimetallic MOFs; Synergistic effect

**\*Corresponding Author:** Jing Zhang

**Email:** zhangjing@sdas.org

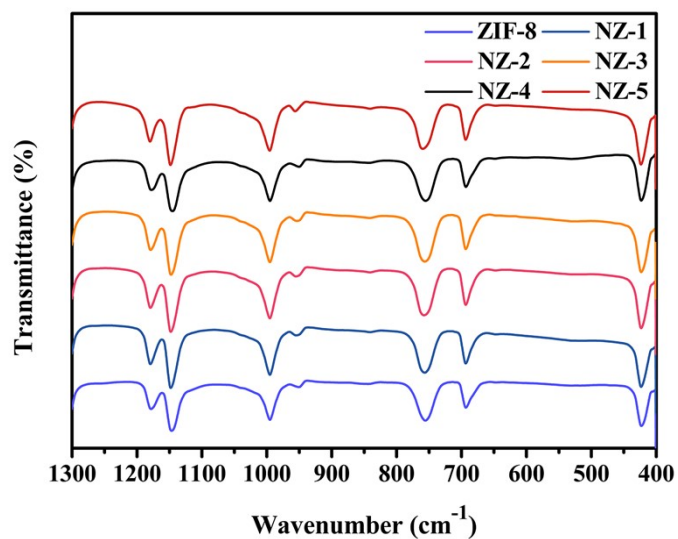

**Fig. S1** Infrared spectrum fingerprint region of ZIF-8 and NZ-X.

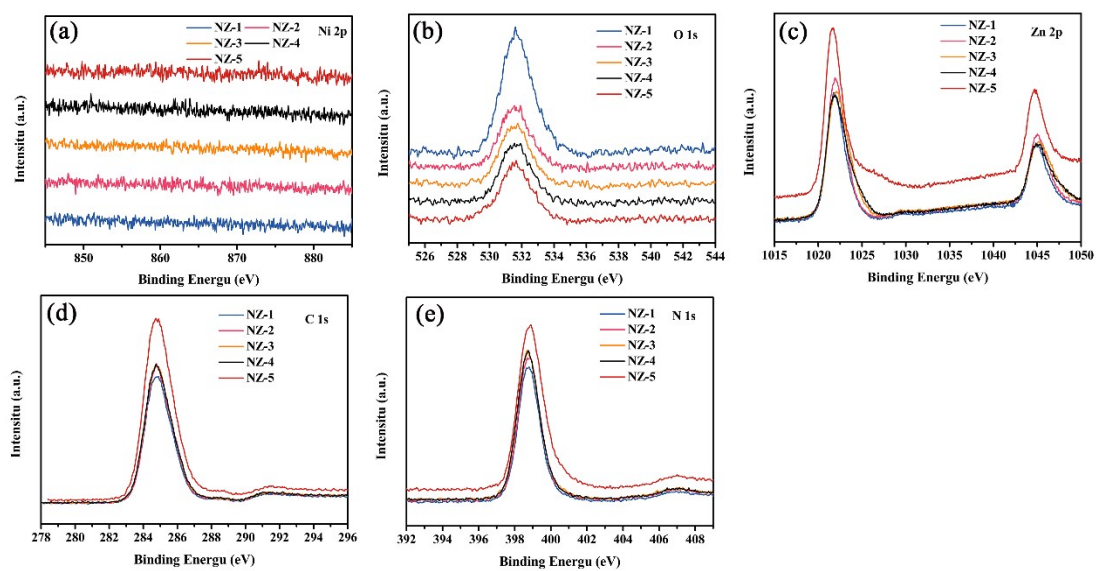

**Fig. S2** (a) Ni2p spectrum of NZ-X, (b) O1s spectrum of NZ-X, (c) Zn 2p spectrum of NZ-X, (d) C1s spectrum of NZ-X, (e) N 1s spectrum of NZ-X

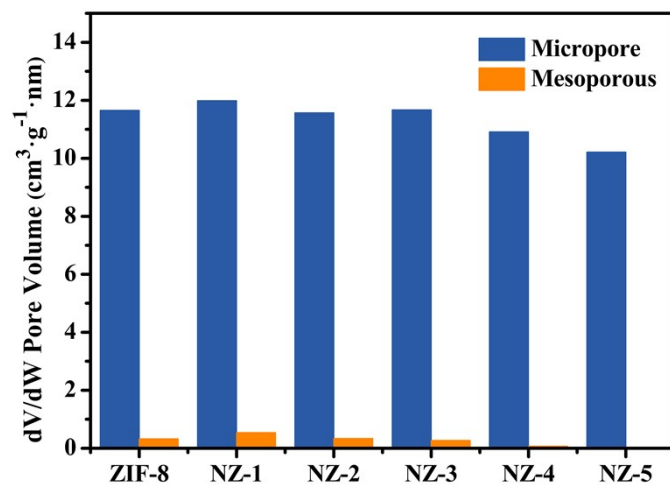

**Fig. S3** Volume of Micropore and Mesoporous of ZIF-8, NZ-1, NZ-2, NZ-3, NZ-4 and NZ-5

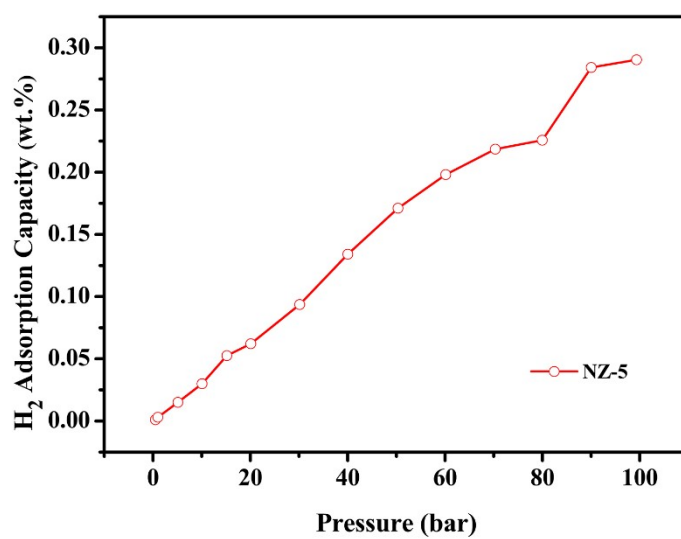

**Fig. S4** H<sub>2</sub> adsorption isotherm of NZ-5 at 298 K and 100 bar.

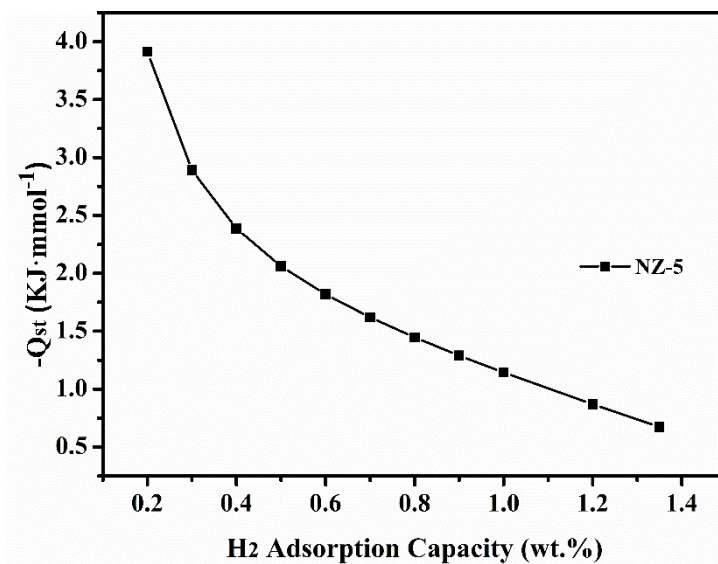

**Fig. S5** Isosteric heats of H<sub>2</sub> adsorption on NZ-5.
